# Supplementary material for: Self-assembled monolayers of optically active Co(iii) complexes: a new promoter electrode recognizing the electron transfer site in cytochrome c
Source: Royal Society of Chemistry journal article supplement (doi:10.1039/b412009d), 2004-12-06
Supplement: b412009d.pdf [file b412009d.pdf]

# Electrical Supplementary Information

Table S1. Second-order rate constants for the oxidation of ferrocyt *c* by Ru<sup>III</sup> complexes.

| $[\text{Ru}^{\text{III}}(\text{L})(\text{bpy})]^0$ | $k / 10^5$<br>[M <sup>-1</sup> s <sup>-1</sup> ] |
|----------------------------------------------------|--------------------------------------------------|
| ( <i>S</i> )-bcmpa                                 | 5.53(4)                                          |
| ( <i>R</i> )-bcmpa                                 | 3.15(2)                                          |
| ( <i>S</i> )-bcmal                                 | 2.48(2)                                          |
| ( <i>R</i> )-bcmal                                 | 2.49(2)                                          |

L = (*S*)-/(*R*)-BCMPA; *N,N*-Bis(carboxymethyl) (*S*)-/(*R*)-phenylalanine,  
(*S*)-/(*R*)-BCMAL; *N,N*-Bis(carboxymethyl) (*S*)-/(*R*)-alanine  
bpy = 2,2'-bipyridine

stopped-flow measurement condition:

Concentration ratio: [cyt *c*] / [Ru<sup>III</sup>] > 50,

Solvent: 1 mM phosphate buffer (pH 6.0, I = 0.05 M (KCl))

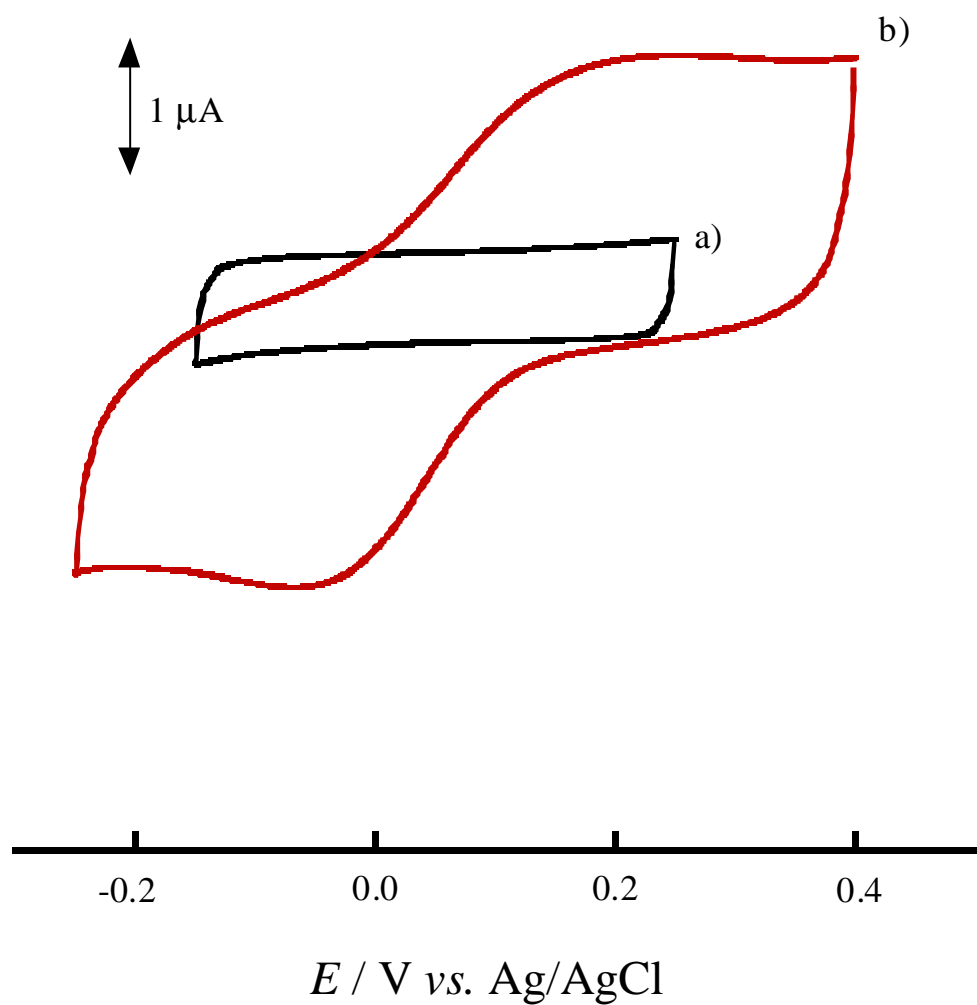

Fig. S1 Cyclic voltammograms in a) buffer solution (black) and b) *cyt c* solution (red), as measured with 3S-Au
